# Supplementary material for: Deterministic control of adhesive crack propagation through jamming based switchable adhesives
Source: Royal Society of Chemistry journal article supplement (doi:10.1039/d0sm02129f), 2021-01-01
Supplement: d0sm02129f1.pdf [file d0sm02129f1.pdf]

# Supporting Information

## Deterministic control of adhesive crack propagation through jamming based switchable adhesives

Cole B. Haverkamp,<sup>c‡</sup> Dohgyu Hwang,<sup>ab‡</sup> Chanhong Lee,<sup>c</sup> and Michael D. Bartlett<sup>ab\*</sup>

<sup>a</sup>Macromolecules Innovation Institute, Virginia Tech, Blacksbrug, VA 24061, USA

<sup>b</sup>Department of Mechanical Engineering, Soft Materials and Structures Lab, Virginia Tech, Blacksbrug, VA 24061, USA

<sup>c</sup>Department of Materials Science & Engineering, Iowa State University, Ames, IA 50011, USA

‡ These authors contributed equally to this work.

\*To whom correspondence should be addressed: mbartlett@vt.edu

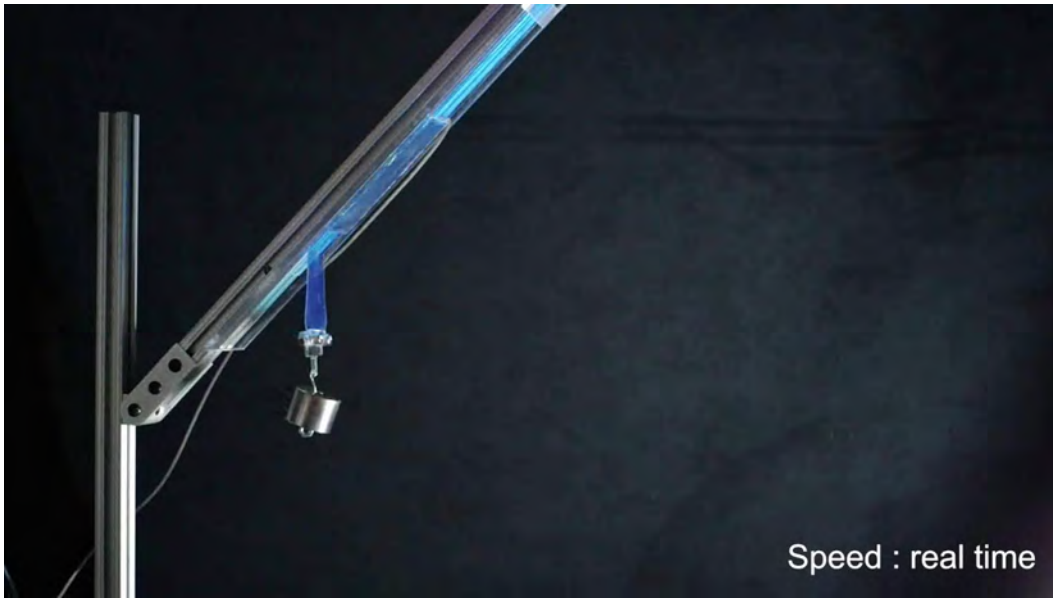

Movie S1: Jamming based crack and adhesion control.

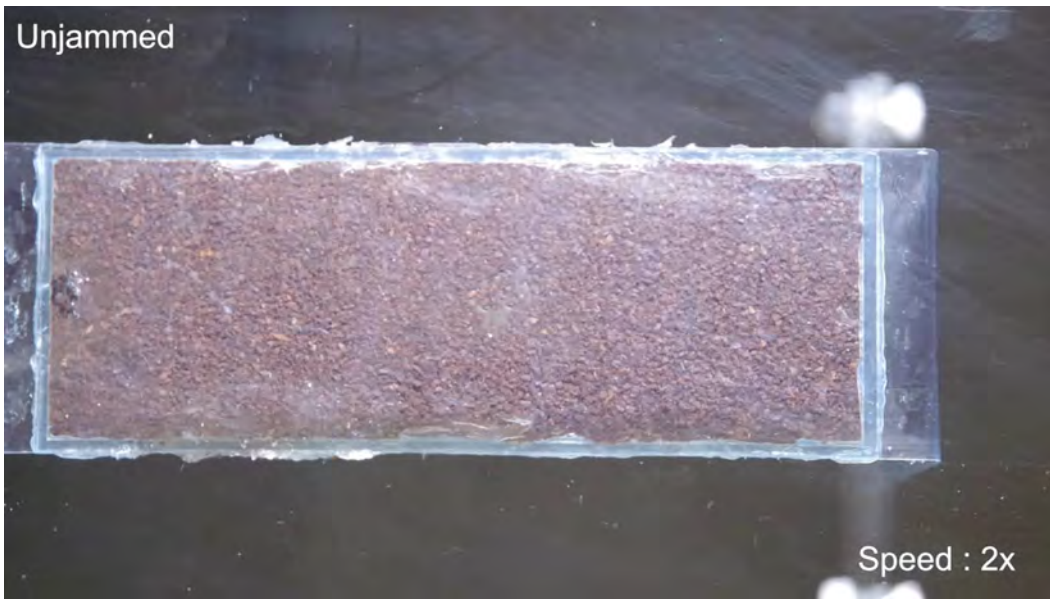

Movie S2: Programmed crack control in a single direction: the on-and-ff state is switched at every 2s.

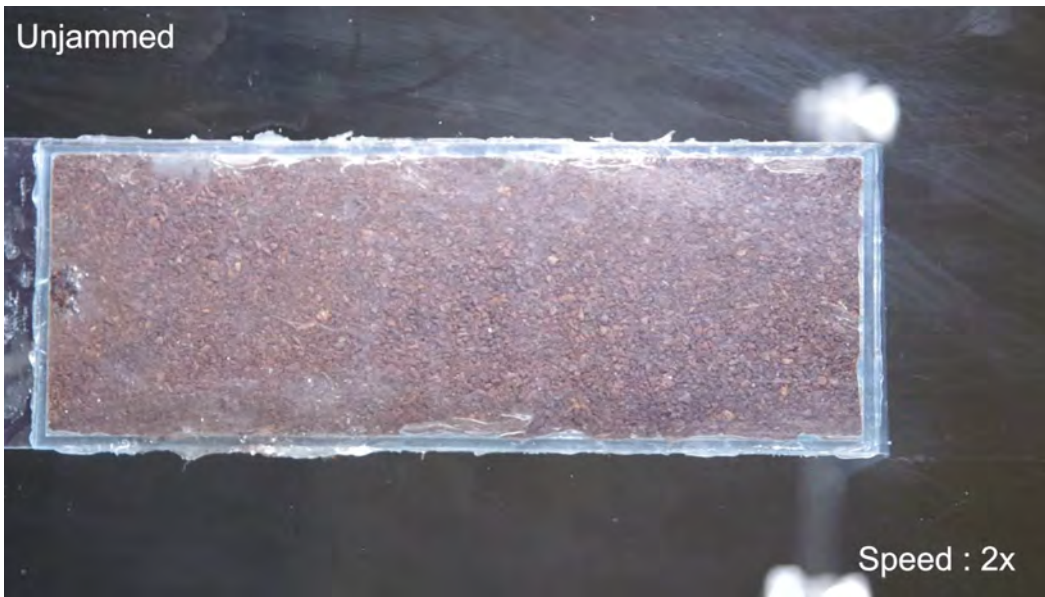

Movie S3: Programmed crack control in a single direction: the on-and-off state is switched at every 5s.

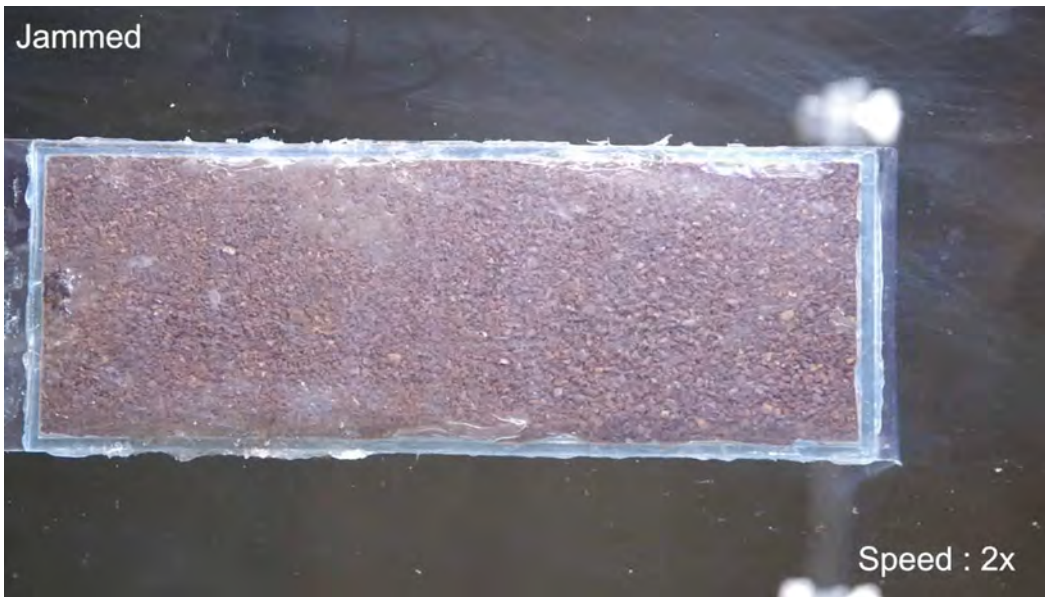

Movie S4: Programmed crack control in a single direction: the on-and-off state is switched arbitrarily.

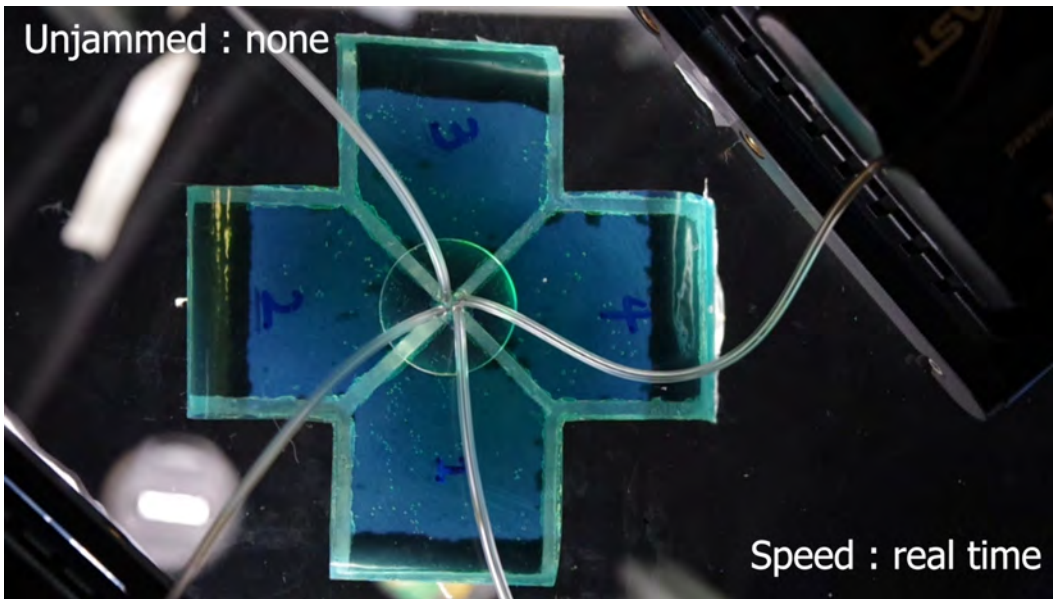

Movie S5: Programmed crack control of four jamming layers in multiple directions.
