# Supplementary figures and images for: Deterministic control of adhesive crack propagation through jamming based switchable adhesives
Source: Royal Society of Chemistry journal article supplement (doi:10.1039/d0sm02129f), 2021-01-01

Unjammed

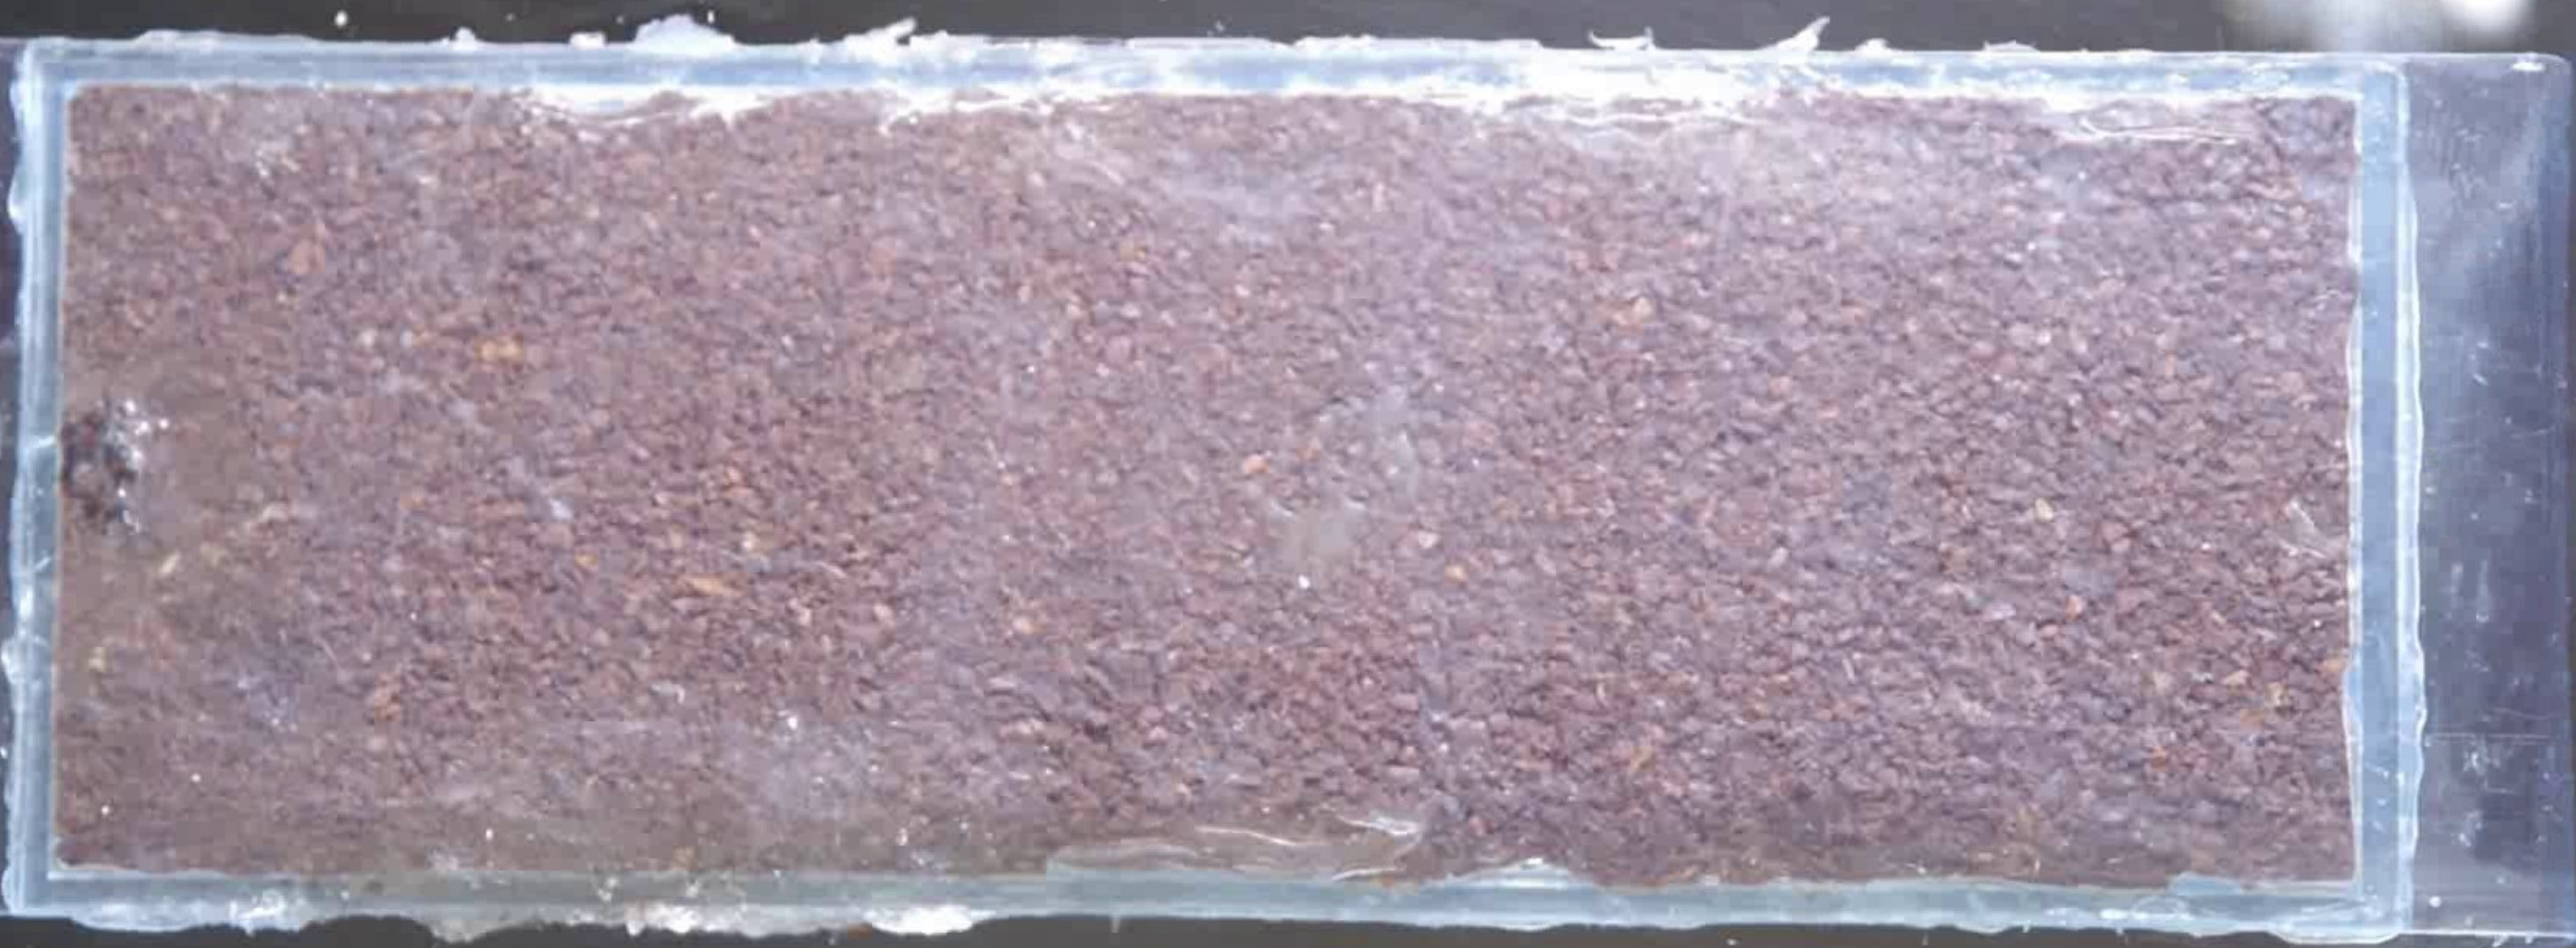

Speed : 2x

Supplement: d0sm02129f7.pdf [file d0sm02129f7.pdf]
